# Supplementary material for: Shifting Retroviral Vector Integrations Away from Transcriptional Start Sites via DNA-Binding Protein Domain Insertion into Integrase
Source: PubMed Central journal article supplement — Mol Ther Methods Clin Dev. 2018 Nov 13;12:58–70. doi: 10.1016/j.omtm.2018.11.001 (PMC6278723; doi:10.1016/j.omtm.2018.11.001), 2018-11-13
Supplement: mmc1.pdf [file mmc1.pdf]

**OMTM, Volume 12**

**Supplemental Information**

**Shifting Retroviral Vector Integrations Away  
from Transcriptional Start Sites via DNA-Binding  
Protein Domain Insertion into Integrase**

**Jung-soo Nam, Ji-eun Lee, Kwang-hee Lee, Yeji Yang, Soo-hyun Kim, Gyu-un Bae, Holsuk Noh, and Kwang-il Lim**

## Tables

**Table S1. Amino acid sequences of promising mutant integrases.**

| Mutant    | Amino acid sequences                                                                                                                                                                                                                                                                                                                                                                                                                                                                                                                                                                                                                                                                                                                 |
|-----------|--------------------------------------------------------------------------------------------------------------------------------------------------------------------------------------------------------------------------------------------------------------------------------------------------------------------------------------------------------------------------------------------------------------------------------------------------------------------------------------------------------------------------------------------------------------------------------------------------------------------------------------------------------------------------------------------------------------------------------------|
| <b>A2</b> | <p>           IENSSPYTSEHFHYTVTDIKDLTKLGAIYDKTKKYWVYQGKPVMPDQFTFELLDLFLHQ<br/>           LTHLSFSKMKALLERSHSPYYMLNRDRTLKNITETCKACAQVNASKSAVKQGTRVRG<br/>           HRPGTHWEIDFTEIKPGLYGKYLIVFDITFSGWIEAFPTKKETAKVVTKLLEEIPRF<br/>           GMPQVLGTDNGPAFVSKVSQTVADLLGIDWKLHCAIRPQSSGQVERMNRITIKETLT<br/>           KLTLATGSRDWVLLLPLALYRARNTPGPHGLTPYEILYGAPPLSATGEKPYKCPECG<br/>           KSFSRSDHLAEHQRTHTGEKPYACPECGKSFSGDLRRHQRTHTGEKPYKCPECG<br/>           GKSFSRDNLKNHQRTHTGEKPYKCPECGKSFSDPGALVRHQRTHTGKKTSGQAG<br/>           QATGEKPASPPLVNFDPDMTRVTNSPSLQAHLQALYLQHEVWRPLAAAYQEQLD<br/>           RPVPHYPYRVGDTVWVRRHQTKNLEPRWKGPLYTVLLTPTALKVDGIAAWIHAHV<br/>           KAADPGGGPSSRLTWRVQRSQNPLKIRLTREAP         </p> |
| <b>B2</b> | <p>           IENSSPYTSEHFHYTVTDIKDLTKLGAIYDKTKKYWVYQGKPVMPDQFTFELLDLFLHQ<br/>           LTHLSFSKMKALLERSHSPYYMLNRDRTLKNITETCKACAQVNASKSAVKQGTRVRG<br/>           HRPGTHWEIDFTEIKPGLYGKYLIVFDITFSGWIEAFPTKKETAKVVTKLLEEIPRF<br/>           GMPQVLGTDNGPAFVSKVSQTVADLLGIDWKLHCAIRPQSSGQVERMNRITIKETLT<br/>           KLTLATGSRDWVLLLPLALYRARNTPGPHGLTPYEILYGAPPLSATGEKPYMAERPFQ<br/>           CRICMRNFSRSDALSRHIRTHTGEKPFACDICGRKFAQSGDLTRHTKIHTGGQRPFQ<br/>           CRICMRNFSQSGDLTRHIRTHTGEKPFACDICGRKFATSGHLSRHTKIHTGGGGSAS<br/>           PPLVNFDPDMTRVTNSPSLQAHLQALYLQHEVWRPLAAAYQEQLDRPVPHYPYR<br/>           VGDVWVRRHQTKNLEPRWKGPLYTVLLTPTALKVDGIAAWIHAHVKAADPGGGP<br/>           SSRLTWRVQRSQNPLKIRLTREAP         </p>    |

The sequence of integrase is shown in black and the sequence of the inserted protein domains is shown in blue.

**Table S2. Total numbers of analyzed integration sites.**

| ZFD insertion mutants |     | PBS mutants |     | Double mutants |     |
|-----------------------|-----|-------------|-----|----------------|-----|
| Wild-type             | 197 | PBS2        | 477 | 5GA + A2       | 126 |
| A1                    | 84  | PBS3        | 432 | 5GA + B2       | 97  |
| A2                    | 100 | PBS4        | 239 | 9CG + A2       | 144 |
| A3                    | 76  | PBS8        | 176 | 9CG + B2       | 174 |
| A4                    | 79  | PBS9        | 288 | PBS4 + A2      | 35  |
| A5                    | 83  | 5GA         | 557 |                |     |
| B1                    | 93  | 5GC         | 538 |                |     |
| B2                    | 120 | 5GT         | 375 |                |     |
| B3                    | 43  | 9CA         | 489 |                |     |
| B4                    | 76  | 9CG         | 450 |                |     |
| B5                    | 75  | 9CT         | 471 |                |     |

**Table S3. List of human oncogenes near retroviral integration sites.**

|                                                           | <b>Wild-type</b> | <b>A3</b> | <b>B1</b> | <b>B4</b> | <b>B5</b> |
|-----------------------------------------------------------|------------------|-----------|-----------|-----------|-----------|
| <b>Total number of integrations</b>                       | 197              | 76        | 93        | 76        | 75        |
| <b>Number of integrations into oncogenic spots</b>        | 6                | 1         | 2         | 1         | 1         |
| <b>Frequency of integrations into oncogenic spots (%)</b> | 3.05             | 1.32      | 2.15      | 1.32      | 1.33      |
| <b>Oncogenes adjacent integration sites</b>               | HOXA9            | PBRM1     | HOXD11    | PBRM1     | ELK4      |
|                                                           | HOXA11           |           |           |           |           |
|                                                           | CCDC6            |           |           |           |           |
|                                                           | Myc              |           |           |           |           |
|                                                           | PSIP1            |           |           |           |           |
|                                                           | PTPN11           |           |           |           |           |

Mutant vector B1 was integrated twice into the genomic region near *HOXD11*.

**Table S4. Frequency of removal of the 5' overhang dinucleotides in the 3' LTR ends of proviruses.**

|                  | <b>Frequency (%)</b> | <b>P-value<br/>(compared with Wild-type)</b> |
|------------------|----------------------|----------------------------------------------|
| <b>Wild-type</b> | 94.4                 |                                              |
| <b>A1</b>        | 41.7                 | < 2.22E-16                                   |
| <b>A2</b>        | 39.0                 | < 2.22E-16                                   |
| <b>A3</b>        | 35.5                 | < 2.22E-16                                   |
| <b>A4</b>        | 55.7                 | 6.10E-15                                     |
| <b>A5</b>        | 54.2                 | 6.23E-16                                     |
| <b>B1</b>        | 61.3                 | 9.01E-13                                     |
| <b>B2</b>        | 39.2                 | < 2.22E-16                                   |
| <b>B3</b>        | 67.4                 | 5.10E-06                                     |
| <b>B4</b>        | 36.8                 | < 2.22E-16                                   |
| <b>B5</b>        | 42.7                 | < 2.22E-16                                   |

Statistical significance of the difference in frequency of the removal of the 5' overhang dinucleotides between wild-type and mutant vectors was determined by the chi-square test. The *P*-value of 2.22E-16 is the smallest value that can be numerically obtained in the statistical package R. *P*-values lower than this value are all displayed as < 2.22E-16 in the package.

## Figures

Figure S1. FACS plots showing GFP expression by HEK 294T cells transduced with wild-type and the mutant retroviral vectors at seven days post transduction

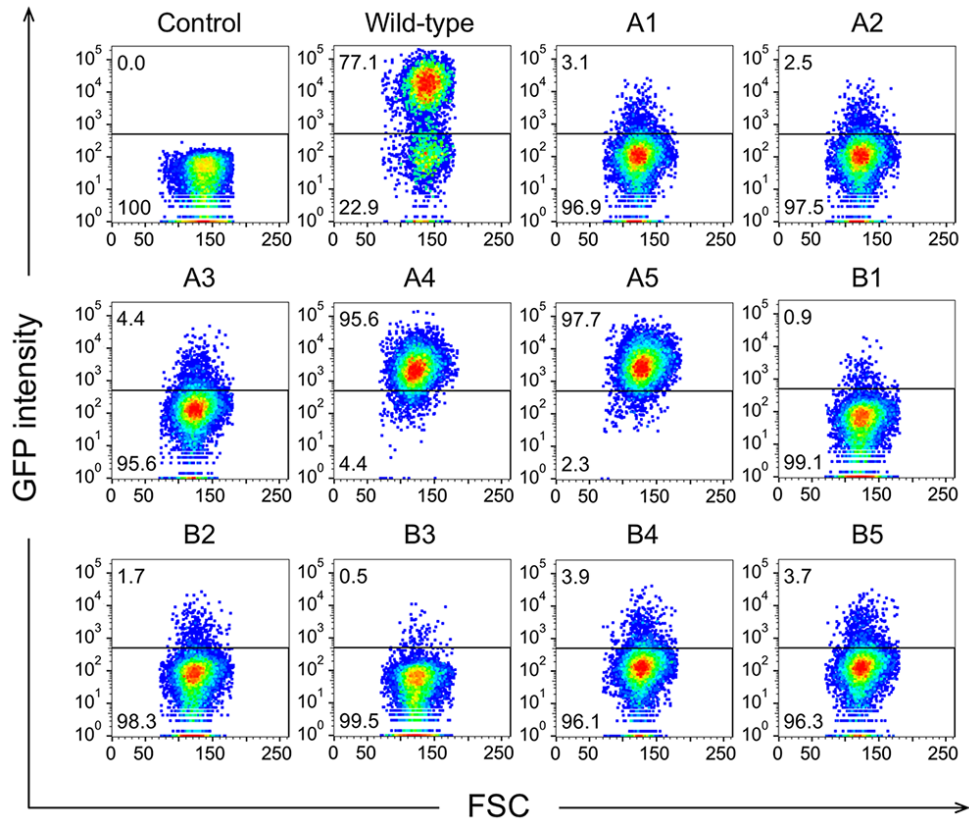

**Figure S2. Schematic representation of reverse transcription and RNA processing during retroviral infection.**

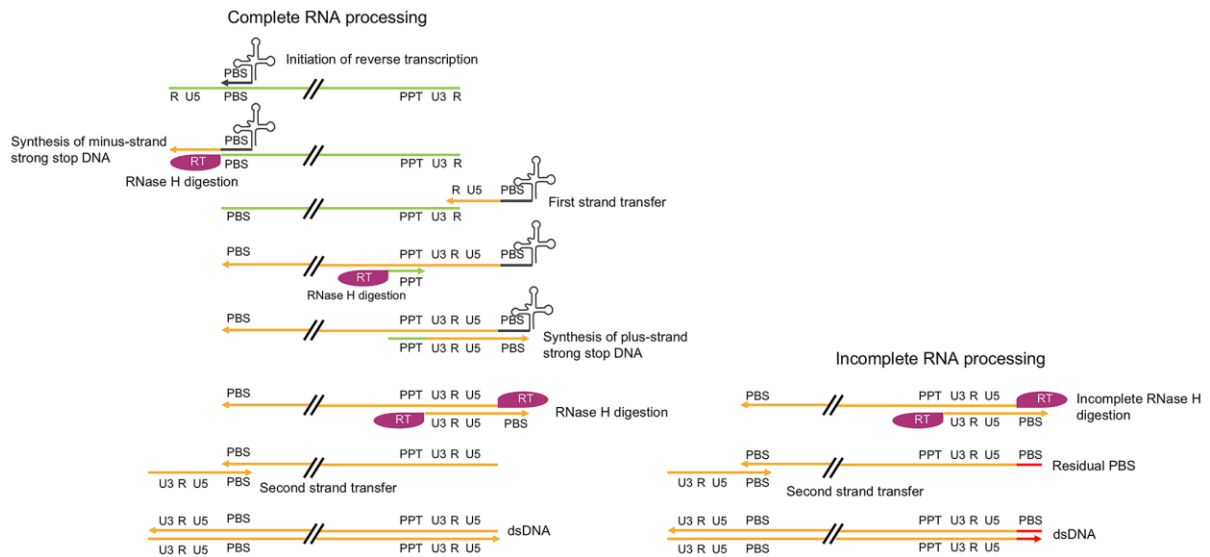

Incomplete RNA processing by the RNase H domain of reverse transcriptase can leave residual PBS sequences next to the end of U5 of the 3' LTR (right panel). These residual PBS sequences are indicated in red. Host tRNA functioning as a primer for reverse transcription is indicated in black. Viral RNA and DNA molecules are indicated in green and orange, respectively. The left panel shows complete RNA processing, and the right panel shows incomplete RNA processing.

**Figure S3. Frequency of the formation of residual PBS sequences in the 3' LTR of proviruses for the A2 mutant.**

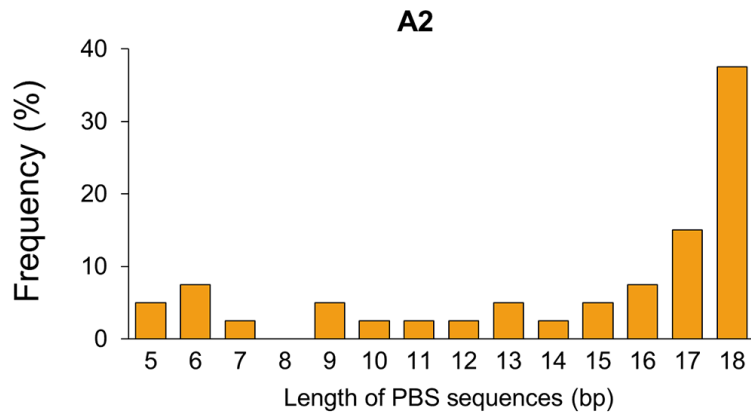

This figure shows the frequency of the occurrence of residual PBS sequences of different length in the 3' LTR ends of proviruses for the A2 mutant vector. The numbers in the x-axis denote the length (in bp) of residual PBS sequences.

**Figure S4. Frequency of formation of residual PBS sequences in the 3' LTR of proviruses for the B2 mutant.**

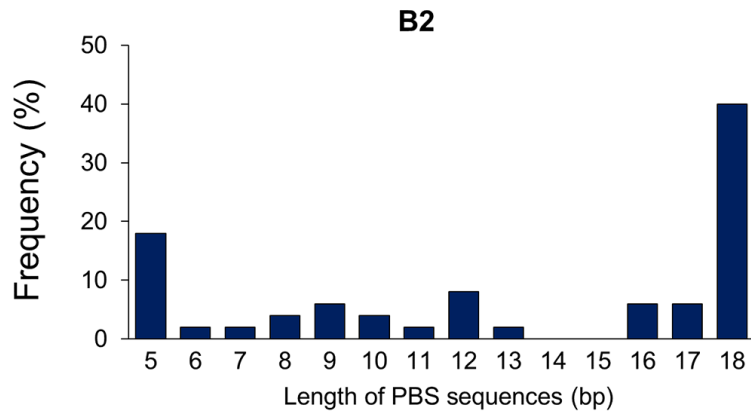

This figure shows the frequency of the occurrence of residual PBS sequences of different length in the 3' LTR ends of proviruses for the B2 mutant vector case. The numbers in the x-axis denote the length (in bp) of residual PBS sequences.

**Figure S5. Frequency of retroviral integrations into different human genomic regions in the presence and absence of residual PBS sequences in the provirus 3' end for mutants with group A ZFDs.**

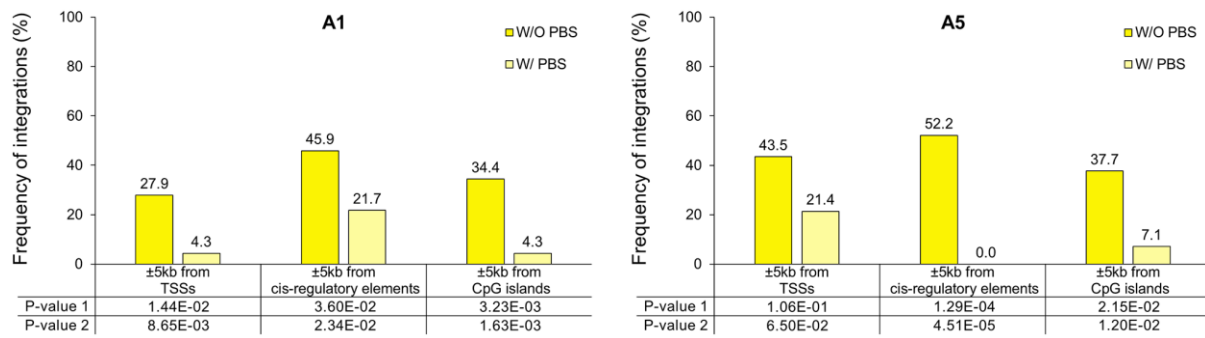

Whether the presence of residual PBS sequences is significantly associated with a lower frequency of vector integrations into each type of genomic regions was tested using Fisher's exact test (*P*-value 1) and Boschloo's test (*P*-value 2). The two resulting *P*-values are presented in the frequency plot.

**Figure S6. Frequency of retroviral integrations into different human genomic regions in the presence and absence of residual PBS sequences in the provirus 3' end for the mutants with group B ZFDs.**

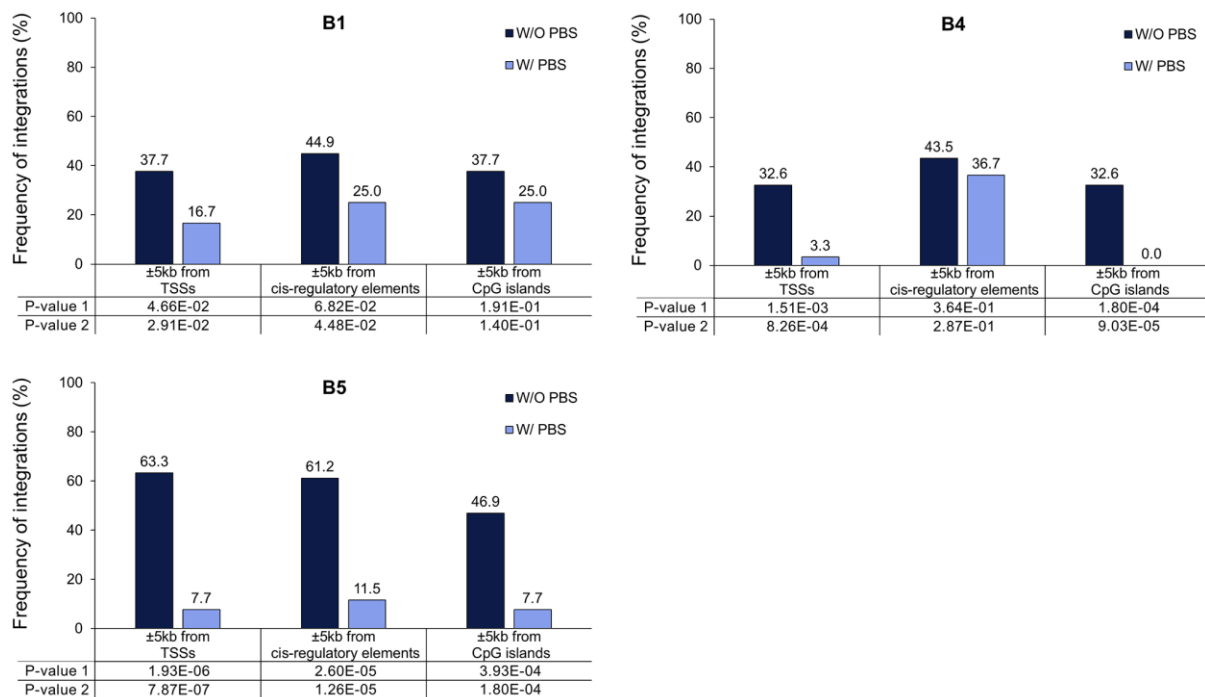

Whether the presence of residual PBS sequences is significantly associated with a lower frequency of vector integrations into each type of genomic regions was tested using Fisher's exact test (*P*-value 1) and Boschloo's test (*P*-value 2). The two resulting *P*-values are presented in the frequency plot.

**Figure S7. Frequency of proviruses with residual PBS sequences.**

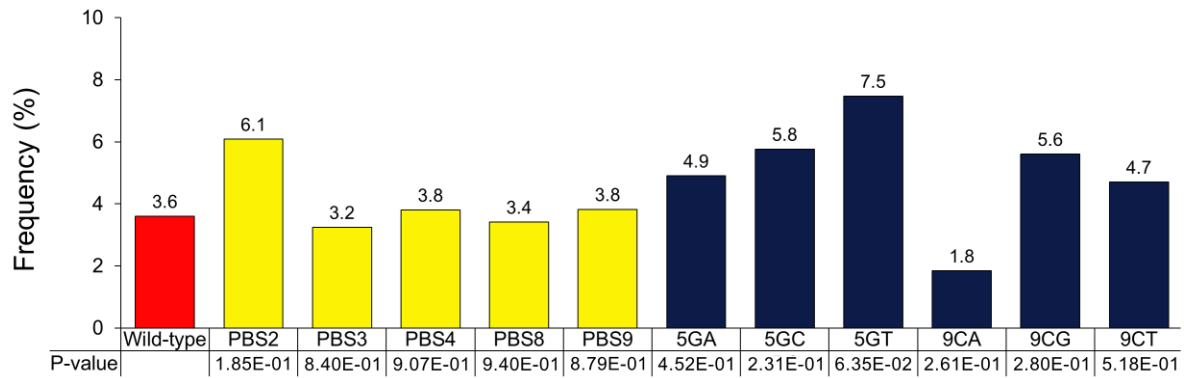

Statistical significance for the difference in frequency of residual PBS sequences between wild-type and mutant vectors is indicated by *P*-values that were obtained by the chi-square test.

**Figure S8. Frequency of retroviral integrations into different human genomic regions for mutants with additional PBSs.**

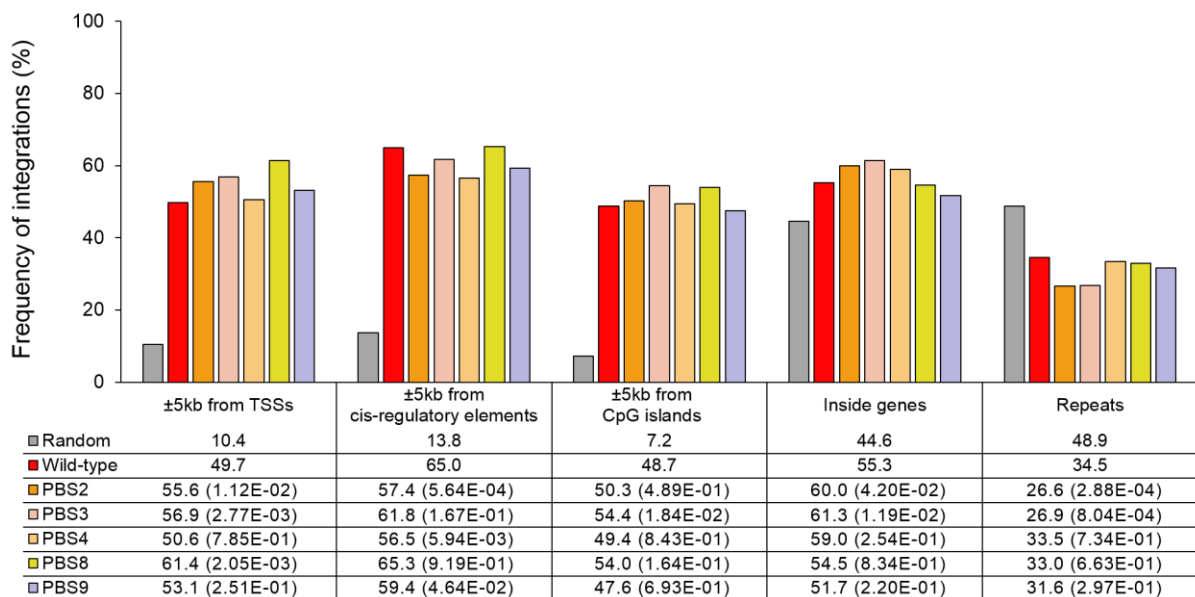

Random integrations were also computationally generated using the QuickMap tool. The relevant frequencies of the random and experimental retroviral integrations into different genomic regions were quantified using the QuickMap tool. Statistical significance of the differences between wild-type and mutant integration patterns is indicated by *P*-values that were obtained by the chi-square test. *P*-values for the comparison with wild-type are shown in parentheses.



**Figure S9. Frequency of retroviral integrations into different human genomic regions for mutants with PBS point mutation.**

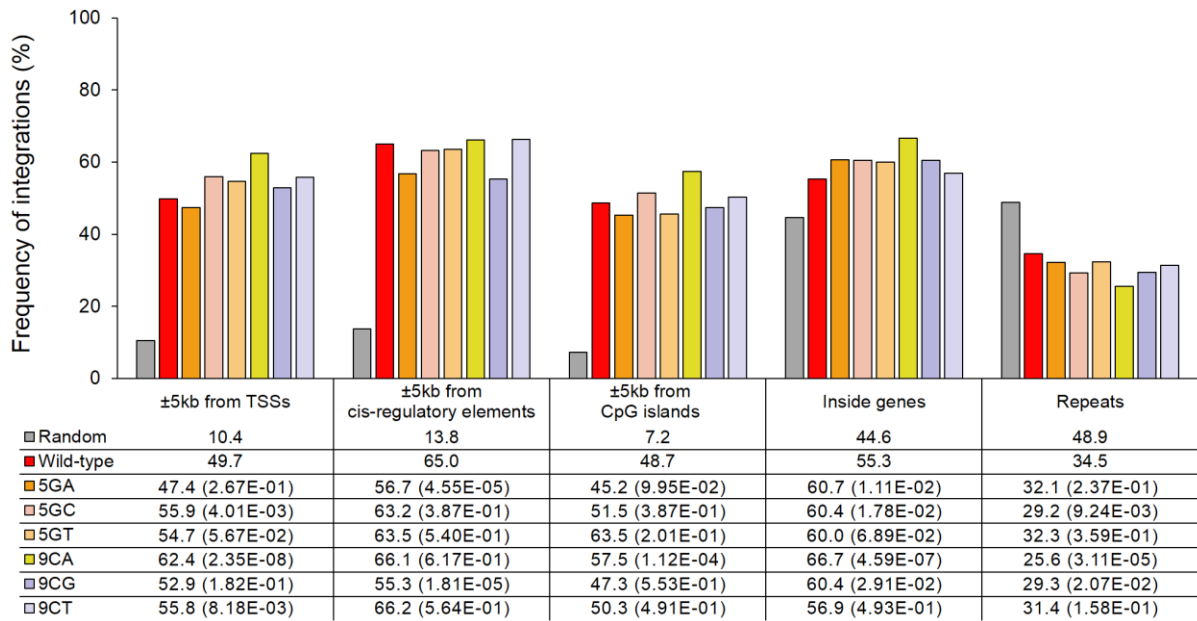

Random integrations were also computationally generated using the QuickMap tool. The relevant frequencies of the random and experimental retroviral integrations into different genomic regions were determined using the QuickMap tool. Statistical significance of the differences between wild-type and mutant integration patterns is indicated by *P*-values that were obtained by the chi-square test. *P*-values for the comparison with wild-type are shown in parentheses.
